# Supplementary material for: Allostatic Load Index Effectively Measures Chronic Stress Status in Zoo-Housed Giraffes
Source: MDPI journal article supplement (doi:10.3390/jzbg4030044), 2023-09-19
Supplement: s1 [file s1]

**Supplemental Table S1.** Pearson correlation coefficients<sup>1</sup> for stress biomarkers and occurrences of documented stress events in male zoo-housed giraffes.

| Variable                   | Variable    |             |           |             |                      |             |             |              |                    |
|----------------------------|-------------|-------------|-----------|-------------|----------------------|-------------|-------------|--------------|--------------------|
|                            | Age         | BCS         | Cortisol  | DHEA-S      | Cortisol /<br>DHEA-S | Cholesterol | NEFA        | Fructosamine | Allostatic<br>Load |
| <b>Age</b>                 | .           | -0.36       | -0.35     | -0.17       | 0.38                 | 0.55        | -0.23       | 0.71         | 0.46               |
|                            | .           | <i>NS</i>   | <i>NS</i> | <i>NS</i>   | <i>NS</i>            | <i>NS</i>   | <i>NS</i>   | <i>0.10</i>  | <i>0. NS</i>       |
| <b>BCS</b>                 | -0.36       | .           | 0.39      | -0.12       | 0.25                 | -0.22       | 0.44        | -0.16        | 0.29               |
|                            | <i>NS</i>   | .           | <i>NS</i> | <i>NS</i>   | <i>NS</i>            | <i>NS</i>   | <i>NS</i>   | <i>NS</i>    | <i>NS</i>          |
| <b>Allostatic Load</b>     | 0.46        | 0.29        | 0.15      | -0.61       | 0.83                 | 0.84        | -0.50       | 0.66         | .                  |
|                            | <i>NS</i>   | <i>NS</i>   | <i>NS</i> | <i>NS</i>   | 0.04                 | <i>0.04</i> | <i>NS</i>   | <i>NS</i>    |                    |
| <b>Immobilizations</b>     | 0.68        | -0.76       | -0.31     | 0.10        | -0.11                | -0.01       | 0.00        | 0.24         | -0.28              |
|                            | <i>NS</i>   | <i>0.08</i> | <i>NS</i> | <i>NS</i>   | <i>NS</i>            | <i>NS</i>   | <i>NS</i>   | <i>NS</i>    | <i>NS</i>          |
| <b>Illnesses</b>           | 0.60        | 0.18        | 0.04      | -0.80       | 0.83                 | 0.54        | -0.06       | 0.31         | 0.77               |
|                            | <i>NS</i>   | <i>NS</i>   | <i>NS</i> | <i>0.06</i> | 0.04                 | <i>NS</i>   | <i>NS</i>   | <i>NS</i>    | <i>0.07</i>        |
| <b>Pregnancies</b>         | .           | .           | .         | .           | .                    | .           | .           | .            | .                  |
|                            | .           | .           | .         | .           | .                    | .           | .           | .            | .                  |
| <b>Transports</b>          | 0.00        | 0.77        | 0.12      | 0.15        | 0.01                 | -0.47       | 0.76        | -0.13        | 0.00               |
|                            | <i>NS</i>   | <i>0.07</i> | <i>NS</i> | <i>NS</i>   | <i>NS</i>            | <i>NS</i>   | <i>0.08</i> | <i>NS</i>    | <i>NS</i>          |
| <b>Total Stress Events</b> | 0.83        | -0.56       | -0.26     | -0.17       | 0.19                 | 0.13        | 0.05        | 0.31         | 0.02               |
|                            | <i>0.04</i> | <i>NS</i>   | <i>NS</i> | <i>NS</i>   | <i>NS</i>            | <i>NS</i>   | <i>NS</i>   | <i>NS</i>    | <i>NS</i>          |
| <b>Stress Events/Year</b>  | 0.48        | 0.08        | -0.50     | 0.23        | 0.09                 | 0.70        | -0.44       | 0.70         | 0.60               |
|                            | <i>NS</i>   | <i>NS</i>   | <i>NS</i> | <i>NS</i>   | <i>NS</i>            | <i>NS</i>   | <i>NS</i>   | <i>NS</i>    | <i>NS</i>          |

<sup>1</sup> Pearson correlation coefficients (r) are the top number for each cell. *P*-values for each correlation are italicized and below each coefficient.

BCS, body condition score; DHEA-S, dehydroepiandrosterone sulfate; NEFA, non-esterified fatty acids; NS, not significant.

**Supplemental Table S2.** Pearson correlation coefficients<sup>1</sup> for stress biomarkers and occurrences of documented stress events in female zoo-housed giraffes.

| Variable                   | Variable    |             |           |             |                      |             |             |              |                    |
|----------------------------|-------------|-------------|-----------|-------------|----------------------|-------------|-------------|--------------|--------------------|
|                            | Age         | BCS         | Cortisol  | DHEA-S      | Cortisol /<br>DHEA-S | Cholesterol | NEFA        | Fructosamine | Allostatic<br>Load |
| <b>Age</b>                 | .           | 0.60        | -0.27     | -0.49       | 0.24                 | 0.51        | 0.12        | 0.13         | 0.09               |
|                            | .           | <i>0.04</i> | <i>NS</i> | <i>0.10</i> | <i>NS</i>            | <i>0.09</i> | <i>NS</i>   | <i>NS</i>    | <i>NS</i>          |
| <b>BCS</b>                 | 0.60        | .           | -0.27     | -0.25       | 0.06                 | 0.29        | 0.13        | -0.12        | -0.37              |
|                            | <i>0.04</i> | .           | <i>NS</i> | <i>NS</i>   | <i>NS</i>            | <i>NS</i>   | <i>NS</i>   | <i>NS</i>    | <i>NS</i>          |
| <b>Allostatic Load</b>     | 0.09        | -0.37       | 0.41      | -0.33       | 0.79                 | 0.35        | 0.49        | 0.47         | ..                 |
|                            | <i>NS</i>   | <i>NS</i>   | <i>NS</i> | <i>NS</i>   | <i>&lt;0.01</i>      | <i>NS</i>   | <i>0.10</i> | <i>NS</i>    | .                  |
| <b>Immobilizations</b>     | 0.51        | 0.16        | 0.15      | -0.23       | 0.42                 | 0.53        | 0.40        | 0.61         | 0.51               |
|                            | <i>0.09</i> | <i>NS</i>   | <i>NS</i> | <i>NS</i>   | <i>NS</i>            | <i>0.08</i> | <i>NS</i>   | <i>0.04</i>  | <i>0.09</i>        |
| <b>Illnesses</b>           | 0.34        | 0.31        | -0.34     | -0.67       | 0.31                 | 0.03        | 0.39        | 0.18         | 0.26               |
|                            | <i>NS</i>   | <i>NS</i>   | <i>NS</i> | <i>0.02</i> | <i>NS</i>            | <i>NS</i>   | <i>NS</i>   | <i>NS</i>    | <i>NS</i>          |
| <b>Pregnancies</b>         | 0.73        | 0.40        | -0.17     | -0.53       | 0.27                 | 0.18        | 0.20        | 0.17         | 0.23               |
|                            | <i>0.01</i> | <i>NS</i>   | <i>NS</i> | <i>0.07</i> | <i>NS</i>            | <i>NS</i>   | <i>NS</i>   | <i>NS</i>    | <i>NS</i>          |
| <b>Transports</b>          | 0.20        | 0.12        | 0.14      | -0.50       | 0.54                 | 0.00        | 0.19        | -0.25        | 0.42               |
|                            | <i>NS</i>   | <i>NS</i>   | <i>NS</i> | <i>0.10</i> | <i>0.07</i>          | <i>NS</i>   | <i>NS</i>   | <i>NS</i>    | <i>NS</i>          |
| <b>Total Stress Events</b> | 0.68        | 0.30        | 0.03      | -0.53       | 0.56                 | 0.51        | 0.52        | 0.60         | 0.61               |
|                            | <i>0.02</i> | <i>NS</i>   | <i>NS</i> | <i>0.08</i> | <i>0.06</i>          | <i>0.09</i> | <i>0.08</i> | <i>0.04</i>  | <i>0.03</i>        |
| <b>Stress Events/Year</b>  | 0.46        | 0.51        | -0.22     | 0.06        | -0.24                | 0.19        | -0.40       | -0.33        | -0.55              |
|                            | <i>NS</i>   | <i>0.09</i> | <i>NS</i> | <i>NS</i>   | <i>NS</i>            | <i>NS</i>   | <i>NS</i>   | <i>NS</i>    | <i>0.06</i>        |

<sup>1</sup> Pearson correlation coefficients (r) are the top number for each cell. *P*-values for each correlation are italicized and below each coefficient.

BCS, body condition score; DHEA-S, dehydroepiandrosterone sulfate; NEFA, non-esterified fatty acids; NS, not significant.

**Supplemental Table S3.** Pearson correlation coefficients<sup>1</sup> for stress biomarkers and occurrences of documented stress events in young (<10 years of age) zoo-housed giraffes.

| Variable                   | Variable        |             |             |             |                      |             |             |              |                    |
|----------------------------|-----------------|-------------|-------------|-------------|----------------------|-------------|-------------|--------------|--------------------|
|                            | Age             | BCS         | Cortisol    | DHEA-S      | Cortisol /<br>DHEA-S | Cholesterol | NEFA        | Fructosamine | Allostatic<br>Load |
| <b>Age</b>                 | .               | 0.38        | 0.37        | 0.62        | 0.06                 | -0.22       | -0.17       | 0.63         | -0.34              |
|                            | .               | <i>NS</i>   | <i>NS</i>   | <i>NS</i>   | <i>NS</i>            | <i>NS</i>   | <i>NS</i>   | <i>NS</i>    | <i>NS</i>          |
| <b>BCS</b>                 | 0.38            | .           | -0.25       | -0.20       | -0.32                | 0.62        | 0.47        | 0.49         | -0.77              |
|                            | <i>NS</i>       | .           | <i>NS</i>   | <i>NS</i>   | <i>NS</i>            | <i>NS</i>   | <i>NS</i>   | <i>NS</i>    | <i>0.07</i>        |
| <b>Allostatic Load</b>     | -0.34           | -0.77       | 0.37        | 0.30        | 0.41                 | -0.07       | -0.10       | -0.12        | .                  |
|                            | <i>NS</i>       | <i>0.07</i> | <i>NS</i>   | <i>NS</i>   | <i>NS</i>            | <i>NS</i>   | <i>NS</i>   | <i>NS</i>    | .                  |
| <b>Immobilizations</b>     | -0.09           | 0.16        | -0.21       | -0.02       | -0.31                | 0.63        | 0.68        | 0.58         | 0.31               |
|                            | <i>NS</i>       | <i>NS</i>   | <i>NS</i>   | <i>NS</i>   | <i>NS</i>            | <i>NS</i>   | <i>NS</i>   | <i>NS</i>    | <i>NS</i>          |
| <b>Illnesses</b>           | 0.13            | 0.53        | -0.71       | -0.67       | -0.71                | 0.10        | 0.47        | -0.31        | -0.69              |
|                            | <i>NS</i>       | <i>NS</i>   | <i>NS</i>   | <i>NS</i>   | <i>NS</i>            | <i>NS</i>   | <i>NS</i>   | <i>NS</i>    | <i>NS</i>          |
| <b>Pregnancies</b>         | 0.85            | 0.20        | 0.73        | 0.80        | 0.52                 | -0.12       | -0.35       | 0.55         | 0.00               |
|                            | <i>0.03</i>     | <i>NS</i>   | <i>0.10</i> | <i>0.05</i> | <i>NS</i>            | <i>NS</i>   | <i>NS</i>   | <i>NS</i>    | <i>NS</i>          |
| <b>Transports</b>          | -0.15           | -0.20       | 0.33        | 0.26        | 0.33                 | 0.51        | 0.31        | 0.29         | 0.77               |
|                            | <i>NS</i>       | <i>NS</i>   | <i>NS</i>   | <i>NS</i>   | <i>NS</i>            | <i>NS</i>   | <i>NS</i>   | <i>NS</i>    | <i>0.07</i>        |
| <b>Total Stress Events</b> | 0.25            | 0.61        | -0.52       | -0.35       | -0.65                | 0.64        | 0.90        | 0.35         | -0.21              |
|                            | <i>NS</i>       | <i>NS</i>   | <i>NS</i>   | <i>NS</i>   | <i>NS</i>            | <i>NS</i>   | <i>0.01</i> | <i>NS</i>    | <i>NS</i>          |
| <b>Stress Events/Year</b>  | 0.95            | 0.24        | 0.49        | 0.69        | 0.23                 | -0.43       | -0.45       | 0.49         | -0.35              |
|                            | <i>&lt;0.01</i> | <i>NS</i>   | <i>NS</i>   | <i>NS</i>   | <i>NS</i>            | <i>NS</i>   | <i>NS</i>   | <i>NS</i>    | <i>NS</i>          |

<sup>1</sup> Pearson correlation coefficients (r) are the top number for each cell. *P*-values for each correlation are italicized and below each coefficient.

BCS, body condition score; DHEA-S, dehydroepiandrosterone sulfate; NEFA, non-esterified fatty acids; NS, not significant.

**Supplemental Table S4.** Pearson correlation coefficients<sup>1</sup> for stress biomarkers and occurrences of documented stress events in older (10+ years of age) zoo-housed giraffes.

| Variable                   | Variable  |           |             |             |                      |             |             |              |                    |
|----------------------------|-----------|-----------|-------------|-------------|----------------------|-------------|-------------|--------------|--------------------|
|                            | Age       | BCS       | Cortisol    | DHEA-S      | Cortisol /<br>DHEA-S | Cholesterol | NEFA        | Fructosamine | Allostatic<br>Load |
| <b>Age</b>                 | .         | 0.36      | 0.07        | -0.22       | 0.17                 | -0.10       | 0.02        | -0.25        | -0.08              |
|                            | .         | <i>NS</i> | <i>NS</i>   | <i>NS</i>   | <i>NS</i>            | <i>NS</i>   | <i>NS</i>   | <i>NS</i>    | <i>NS</i>          |
| <b>BCS</b>                 | 0.36      | .         | 0.17        | -0.21       | 0.13                 | -0.32       | 0.09        | -0.24        | -0.15              |
|                            | <i>NS</i> | .         | <i>NS</i>   | <i>NS</i>   | <i>NS</i>            | <i>NS</i>   | <i>NS</i>   | <i>NS</i>    | <i>NS</i>          |
| <b>Allostatic Load</b>     | -0.08     | -0.15     | 0.66        | -0.35       | 0.80                 | 0.39        | 0.38        | 0.43         | .                  |
|                            | <i>NS</i> | <i>NS</i> | <i>0.02</i> | <i>NS</i>   | <i>&lt;0.01</i>      | <i>NS</i>   | <i>NS</i>   | <i>NS</i>    | .                  |
| <b>Immobilizations</b>     | 0.25      | -0.29     | 0.53        | 0.13        | 0.23                 | 0.01        | 0.36        | 0.43         | 0.27               |
|                            | <i>NS</i> | <i>NS</i> | <i>0.07</i> | <i>NS</i>   | <i>NS</i>            | <i>NS</i>   | <i>NS</i>   | <i>NS</i>    | <i>NS</i>          |
| <b>Illnesses</b>           | 0.13      | 0.16      | 0.19        | -0.61       | 0.42                 | -0.13       | 0.18        | 0.04         | 0.41               |
|                            | <i>NS</i> | <i>NS</i> | <i>NS</i>   | <i>0.04</i> | <i>NS</i>            | <i>NS</i>   | <i>NS</i>   | <i>NS</i>    | <i>NS</i>          |
| <b>Pregnancies</b>         | 0.42      | 0.36      | 0.01        | -0.51       | 0.17                 | -0.62       | 0.24        | 0.09         | 0.06               |
|                            | <i>NS</i> | <i>NS</i> | <i>NS</i>   | <i>0.09</i> | <i>NS</i>            | <i>0.03</i> | <i>NS</i>   | <i>NS</i>    | <i>NS</i>          |
| <b>Transports</b>          | 0.16      | 0.45      | 0.12        | -0.34       | 0.43                 | -0.20       | 0.43        | -0.32        | 0.29               |
|                            | <i>NS</i> | <i>NS</i> | <i>NS</i>   | <i>NS</i>   | <i>NS</i>            | <i>NS</i>   | <i>NS</i>   | <i>NS</i>    | <i>NS</i>          |
| <b>Total Stress Events</b> | 0.40      | -0.13     | 0.65        | -0.21       | 0.48                 | -0.17       | 0.54        | 0.44         | 0.48               |
|                            | <i>NS</i> | <i>NS</i> | <i>0.02</i> | <i>NS</i>   | <i>NS</i>            | <i>NS</i>   | <i>0.07</i> | <i>NS</i>    | <i>NS</i>          |
| <b>Stress Events/Year</b>  | 0.03      | 0.37      | -0.50       | 0.28        | -0.32                | 0.18        | -0.50       | -0.48        | -0.44              |
|                            | <i>NS</i> | <i>NS</i> | <i>0.10</i> | <i>NS</i>   | <i>NS</i>            | <i>NS</i>   | <i>0.09</i> | <i>NS</i>    | <i>NS</i>          |

<sup>1</sup> Pearson correlation coefficients (r) are the top number for each cell. *P*-values for each correlation are italicized and below each coefficient.

BCS, body condition score; DHEA-S, dehydroepiandrosterone sulfate; NEFA, non-esterified fatty acids; NS, not significant.

**Supplemental Table S5.** Spearman correlation coefficients<sup>1</sup> for stress biomarkers and occurrences of documented stress events in male zoo-housed giraffes.

| Variable                   | Variable  |             |           |           |                      |             |             |              |                    |
|----------------------------|-----------|-------------|-----------|-----------|----------------------|-------------|-------------|--------------|--------------------|
|                            | Age       | BCS         | Cortisol  | DHEA-S    | Cortisol /<br>DHEA-S | Cholesterol | NEFA        | Fructosamine | Allostatic<br>Load |
| <b>Age</b>                 | .         | -0.27       | -0.18     | -0.26     | 0.09                 | 0.44        | -0.44       | 0.79         | 0.52               |
|                            | .         | <i>NS</i>   | <i>NS</i> | <i>NS</i> | <i>NS</i>            | <i>NS</i>   | <i>NS</i>   | <i>0.06</i>  | <i>NS</i>          |
| <b>BCS</b>                 | -0.27     | .           | 0.39      | 0.13      | 0.39                 | -0.13       | 0.65        | -0.13        | 0.31               |
|                            | <i>NS</i> | .           | <i>NS</i> | <i>NS</i> | <i>NS</i>            | <i>NS</i>   | <i>NS</i>   | <i>NS</i>    | <i>NS</i>          |
| <b>Allostatic Load</b>     | 0.52      | 0.31        | -0.07     | -0.17     | 0.17                 | 0.85        | -0.44       | 0.85         | .                  |
|                            | <i>NS</i> | <i>NS</i>   | <i>NS</i> | <i>NS</i> | <i>NS</i>            | <i>0.03</i> | <i>NS</i>   | <i>0.03</i>  | .                  |
| <b>Immobilizations</b>     | 0.62      | -0.65       | 0.03      | -0.26     | 0.09                 | -0.14       | -0.26       | 0.14         | -0.30              |
|                            | <i>NS</i> | <i>NS</i>   | <i>NS</i> | <i>NS</i> | <i>NS</i>            | <i>NS</i>   | <i>NS</i>   | <i>NS</i>    | <i>NS</i>          |
| <b>Illnesses</b>           | 0.59      | 0.27        | 0.09      | -0.56     | 0.38                 | 0.09        | 0.12        | 0.29         | 0.44               |
|                            | <i>NS</i> | <i>NS</i>   | <i>NS</i> | <i>NS</i> | <i>NS</i>            | <i>NS</i>   | <i>NS</i>   | <i>NS</i>    | <i>NS</i>          |
| <b>Pregnancies</b>         | .         | .           | .         | .         | .                    | .           | .           | .            | .                  |
|                            | .         | .           | .         | .         | .                    | .           | .           | .            | .                  |
| <b>Transports</b>          | 0.00      | 0.77        | 0.17      | 0.34      | 0.17                 | -0.51       | 0.85        | -0.17        | 0.00               |
|                            | <i>NS</i> | <i>0.07</i> | <i>NS</i> | <i>NS</i> | <i>NS</i>            | <i>NS</i>   | <i>0.03</i> | <i>NS</i>    | <i>NS</i>          |
| <b>Total Stress Events</b> | 0.67      | -0.66       | -0.23     | -0.32     | -0.09                | -0.14       | -0.23       | 0.17         | -0.22              |
|                            | <i>NS</i> | <i>NS</i>   | <i>NS</i> | <i>NS</i> | <i>NS</i>            | <i>NS</i>   | <i>NS</i>   | <i>NS</i>    | <i>NS</i>          |
| <b>Stress Events/Year</b>  | 0.62      | 0.13        | -0.49     | 0.37      | -0.31                | 0.60        | -0.31       | 0.89         | 0.78               |
|                            | <i>NS</i> | <i>NS</i>   | <i>NS</i> | <i>NS</i> | <i>NS</i>            | <i>NS</i>   | <i>NS</i>   | <i>0.02</i>  | <i>0.07</i>        |

<sup>1</sup> Spearman correlation coefficients (r) are the top number for each cell. *P*-values for each correlation are italicized and below each coefficient.

BCS, body condition score; DHEA-S, dehydroepiandrosterone sulfate; NEFA, non-esterified fatty acids; NS, not significant.

**Supplemental Table S6.** Spearman correlation coefficients<sup>1</sup> for stress biomarkers and occurrences of documented stress events in female zoo-housed giraffes.

| Variable                   | Variable        |             |           |             |                      |             |             |              |                    |
|----------------------------|-----------------|-------------|-----------|-------------|----------------------|-------------|-------------|--------------|--------------------|
|                            | Age             | BCS         | Cortisol  | DHEA-S      | Cortisol /<br>DHEA-S | Cholesterol | NEFA        | Fructosamine | Allostatic<br>Load |
| <b>Age</b>                 | .               | 0.58        | -0.29     | -0.53       | 0.05                 | 0.56        | 0.41        | 0.32         | 0.00               |
|                            | .               | <i>0.05</i> | <i>NS</i> | <i>0.08</i> | <i>NS</i>            | <i>0.06</i> | <i>NS</i>   | <i>NS</i>    | <i>NS</i>          |
| <b>BCS</b>                 | 0.58            | .           | -0.33     | -0.20       | -0.13                | 0.19        | 0.17        | -0.21        | -0.61              |
|                            | <i>0.05</i>     | .           | <i>NS</i> | <i>NS</i>   | <i>NS</i>            | <i>NS</i>   | <i>NS</i>   | <i>NS</i>    | <i>0.04</i>        |
| <b>Allostatic Load</b>     | 0.00            | -0.61       | 0.42      | -0.14       | 0.49                 | 0.21        | 0.34        | 0.65         | .                  |
|                            | <i>NS</i>       | <i>0.04</i> | <i>NS</i> | <i>NS</i>   | <i>0.10</i>          | <i>NS</i>   | <i>NS</i>   | <i>0.02</i>  | .                  |
| <b>Immobilizations</b>     | 0.63            | 0.13        | -0.06     | -0.41       | 0.20                 | 0.56        | 0.65        | 0.63         | 0.57               |
|                            | <i>0.03</i>     | <i>NS</i>   | <i>NS</i> | <i>NS</i>   | <i>NS</i>            | <i>0.06</i> | <i>0.02</i> | <i>0.03</i>  | <i>0.05</i>        |
| <b>Illnesses</b>           | 0.30            | 0.28        | -0.35     | -0.55       | 0.08                 | 0.02        | 0.54        | 0.09         | 0.00               |
|                            | <i>NS</i>       | <i>NS</i>   | <i>NS</i> | <i>0.07</i> | <i>NS</i>            | <i>NS</i>   | <i>0.07</i> | <i>NS</i>    | <i>NS</i>          |
| <b>Pregnancies</b>         | 0.73            | 0.33        | -0.24     | -0.53       | 0.22                 | 0.28        | 0.43        | 0.32         | 0.14               |
|                            | <i>0.01</i>     | <i>NS</i>   | <i>NS</i> | <i>0.08</i> | <i>NS</i>            | <i>NS</i>   | <i>NS</i>   | <i>NS</i>    | <i>NS</i>          |
| <b>Transports</b>          | 0.11            | 0.14        | 0.01      | -0.40       | 0.50                 | 0.02        | 0.23        | -0.18        | 0.29               |
|                            | <i>NS</i>       | <i>NS</i>   | <i>NS</i> | <i>NS</i>   | <i>0.09</i>          | <i>NS</i>   | <i>NS</i>   | <i>NS</i>    | <i>NS</i>          |
| <b>Total Stress Events</b> | 0.76            | 0.31        | -0.09     | -0.58       | 0.29                 | 0.57        | 0.67        | 0.59         | 0.46               |
|                            | <i>&lt;0.01</i> | <i>NS</i>   | <i>NS</i> | <i>0.05</i> | <i>NS</i>            | <i>0.05</i> | <i>0.02</i> | <i>0.04</i>  | <i>NS</i>          |
| <b>Stress Events/Year</b>  | 0.55            | 0.58        | -0.25     | -0.22       | -0.20                | 0.27        | -0.16       | -0.11        | -0.62              |
|                            | <i>0.06</i>     | <i>0.05</i> | <i>NS</i> | <i>NS</i>   | <i>NS</i>            | <i>NS</i>   | <i>NS</i>   | <i>NS</i>    | <i>0.03</i>        |

<sup>1</sup> Spearman correlation coefficients (r) are the top number for each cell. *P*-values for each correlation are italicized and below each coefficient.

BCS, body condition score; DHEA-S, dehydroepiandrosterone sulfate; NEFA, non-esterified fatty acids; NS, not significant.

**Supplemental Table S7.** Spearman correlation coefficients<sup>1</sup> for stress biomarkers and occurrences of documented stress events in young (<10 years of age) zoo-housed giraffes.

| Variable                   | Variable    |             |           |             |                      |             |             |              |                    |
|----------------------------|-------------|-------------|-----------|-------------|----------------------|-------------|-------------|--------------|--------------------|
|                            | Age         | BCS         | Cortisol  | DHEA-S      | Cortisol /<br>DHEA-S | Cholesterol | NEFA        | Fructosamine | Allostatic<br>Load |
| <b>Age</b>                 | .           | 0.42        | 0.15      | 0.31        | 0.00                 | -0.28       | -0.06       | 0.77         | -0.46              |
|                            | .           | <i>NS</i>   | <i>NS</i> | <i>NS</i>   | <i>NS</i>            | <i>NS</i>   | <i>NS</i>   | <i>0.07</i>  | <i>NS</i>          |
| <b>BCS</b>                 | 0.42        | .           | -0.39     | -0.39       | -0.13                | 0.65        | 0.65        | 0.39         | -0.77              |
|                            | <i>NS</i>   | .           | <i>NS</i> | <i>NS</i>   | <i>NS</i>            | <i>NS</i>   | <i>NS</i>   | <i>NS</i>    | <i>0.07</i>        |
| <b>Allostatic Load</b>     | -0.46       | -0.77       | 0.34      | 0.51        | 0.34                 | -0.17       | -0.34       | -0.17        | .                  |
|                            | <i>NS</i>   | <i>0.07</i> | <i>NS</i> | <i>NS</i>   | <i>NS</i>            | <i>NS</i>   | <i>NS</i>   | <i>NS</i>    | .                  |
| <b>Immobilizations</b>     | -0.13       | 0.14        | -0.33     | 0.15        | -0.09                | 0.58        | 0.58        | 0.39         | 0.36               |
|                            | <i>NS</i>   | <i>NS</i>   | <i>NS</i> | <i>NS</i>   | <i>NS</i>            | <i>NS</i>   | <i>NS</i>   | <i>NS</i>    | <i>NS</i>          |
| <b>Illnesses</b>           | 0.27        | 0.54        | -0.62     | -0.79       | -0.62                | 0.03        | 0.47        | -0.26        | -0.70              |
|                            | <i>NS</i>   | <i>NS</i>   | <i>NS</i> | <i>0.06</i> | <i>NS</i>            | <i>NS</i>   | <i>NS</i>   | <i>NS</i>    | <i>NS</i>          |
| <b>Pregnancies</b>         | 0.71        | 0.20        | 0.65      | 0.65        | 0.65                 | -0.13       | -0.39       | 0.65         | 0.00               |
|                            | <i>NS</i>   | <i>NS</i>   | <i>NS</i> | <i>NS</i>   | <i>NS</i>            | <i>NS</i>   | <i>NS</i>   | <i>NS</i>    | <i>NS</i>          |
| <b>Transports</b>          | -0.28       | -0.20       | 0.13      | 0.39        | 0.39                 | 0.39        | 0.13        | 0.13         | 0.77               |
|                            | <i>NS</i>   | <i>NS</i>   | <i>NS</i> | <i>NS</i>   | <i>NS</i>            | <i>NS</i>   | <i>NS</i>   | <i>NS</i>    | <i>0.07</i>        |
| <b>Total Stress Events</b> | 0.36        | 0.66        | -0.64     | -0.38       | -0.41                | 0.49        | 0.81        | 0.29         | -0.26              |
|                            | <i>NS</i>   | <i>NS</i>   | <i>NS</i> | <i>NS</i>   | <i>NS</i>            | <i>NS</i>   | <i>0.05</i> | <i>NS</i>    | <i>NS</i>          |
| <b>Stress Events/Year</b>  | 0.93        | 0.13        | 0.37      | 0.49        | 0.09                 | -0.54       | -0.37       | 0.71         | -0.34              |
|                            | <i>0.01</i> | <i>NS</i>   | <i>NS</i> | <i>NS</i>   | <i>NS</i>            | <i>NS</i>   | <i>NS</i>   | <i>NS</i>    | <i>NS</i>          |

<sup>1</sup> Spearman correlation coefficients (r) are the top number for each cell. *P*-values for each correlation are italicized and below each coefficient.

BCS, body condition score; DHEA-S, dehydroepiandrosterone sulfate; NEFA, non-esterified fatty acids; NS, not significant.

**Supplemental Table S8.** Spearman correlation coefficients<sup>1</sup> for stress biomarkers and occurrences of documented stress events in older (10+ years of age) zoo-housed giraffes.

| Variable                   | Variable  |           |             |           |                      |             |             |                 |                    |
|----------------------------|-----------|-----------|-------------|-----------|----------------------|-------------|-------------|-----------------|--------------------|
|                            | Age       | BCS       | Cortisol    | DHEA-S    | Cortisol /<br>DHEA-S | Cholesterol | NEFA        | Fructosamine    | Allostatic<br>Load |
| <b>Age</b>                 | .         | 0.39      | 0.12        | -0.27     | 0.19                 | -0.01       | 0.19        | -0.04           | -0.07              |
|                            | .         | <i>NS</i> | <i>NS</i>   | <i>NS</i> | <i>NS</i>            | <i>NS</i>   | <i>NS</i>   | <i>NS</i>       | <i>NS</i>          |
| <b>BCS</b>                 | 0.39      | .         | 0.06        | -0.09     | 0.20                 | -0.26       | 0.17        | -0.43           | -0.34              |
|                            | <i>NS</i> | .         | <i>NS</i>   | <i>NS</i> | <i>NS</i>            | <i>NS</i>   | <i>NS</i>   | <i>NS</i>       | <i>NS</i>          |
| <b>Allostatic Load</b>     | -0.07     | -0.34     | 0.41        | -0.32     | 0.43                 | 0.37        | 0.17        | 0.84            | .                  |
|                            | <i>NS</i> | <i>NS</i> | <i>NS</i>   | <i>NS</i> | <i>NS</i>            | <i>NS</i>   | <i>NS</i>   | <i>&lt;0.01</i> | .                  |
| <b>Immobilizations</b>     | 0.43      | -0.29     | 0.46        | -0.07     | 0.24                 | -0.05       | 0.19        | 0.35            | 0.30               |
|                            | <i>NS</i> | <i>NS</i> | <i>NS</i>   | <i>NS</i> | <i>NS</i>            | <i>NS</i>   | <i>NS</i>   | <i>NS</i>       | <i>NS</i>          |
| <b>Illnesses</b>           | 0.19      | 0.11      | 0.10        | -0.47     | 0.41                 | -0.09       | 0.24        | 0.15            | 0.34               |
|                            | <i>NS</i> | <i>NS</i> | <i>NS</i>   | <i>NS</i> | <i>NS</i>            | <i>NS</i>   | <i>NS</i>   | <i>NS</i>       | <i>NS</i>          |
| <b>Pregnancies</b>         | 0.32      | 0.30      | -0.01       | -0.41     | 0.33                 | -0.52       | 0.53        | 0.07            | -0.05              |
|                            | <i>NS</i> | <i>NS</i> | <i>NS</i>   | <i>NS</i> | <i>NS</i>            | <i>0.08</i> | <i>0.08</i> | <i>NS</i>       | <i>NS</i>          |
| <b>Transports</b>          | 0.15      | 0.43      | 0.04        | -0.31     | 0.28                 | -0.16       | 0.45        | -0.26           | 0.18               |
|                            | <i>NS</i> | <i>NS</i> | <i>NS</i>   | <i>NS</i> | <i>NS</i>            | <i>NS</i>   | <i>NS</i>   | <i>NS</i>       | <i>NS</i>          |
| <b>Total Stress Events</b> | 0.47      | -0.20     | 0.40        | -0.06     | 0.21                 | -0.24       | 0.44        | 0.25            | 0.27               |
|                            | <i>NS</i> | <i>NS</i> | <i>NS</i>   | <i>NS</i> | <i>NS</i>            | <i>NS</i>   | <i>NS</i>   | <i>NS</i>       | <i>NS</i>          |
| <b>Stress Events/Year</b>  | 0.05      | 0.41      | -0.57       | 0.24      | -0.49                | 0.31        | -0.30       | -0.39           | -0.46              |
|                            | <i>NS</i> | <i>NS</i> | <i>0.05</i> | <i>NS</i> | <i>0.10</i>          | <i>NS</i>   | <i>NS</i>   | <i>NS</i>       | <i>NS</i>          |

<sup>1</sup> Spearman correlation coefficients (r) are the top number for each cell. *P*-values for each correlation are italicized and below each coefficient.

BCS, body condition score; DHEA-S, dehydroepiandrosterone sulfate; NEFA, non-esterified fatty acids; NS, not significant.
